# Supplementary material for: Cancer Mortality by Country of Birth, Sex, and Socioeconomic Position in Sweden, 1961–2009
Source: PLoS One. 2014 Mar 28;9(3):e93174. doi: 10.1371/journal.pone.0093174 (PMC3969357; doi:10.1371/journal.pone.0093174)
Supplement: Table S2 — All-site cancer mortality rate ratios (MRR) and 95% confidence interval (CI) in women by continent, region, and country of birth in Sweden, 1961–2009. *Mortality rate ratios (MRRs) are adjusted for age at follow-up and calendar period at baseline. The reference group is Sweden-born women. MRR values significantly different from 1.0 are highlighted in bold. **Continents, regions, and countries with at least five cases of cancer mortality. aThe former Czechoslovakia includes Czechoslovakia, Slovakia, and the Czech Republic. bThe former Soviet Union includes Belarus, Moldova, Russian Federation, Soviet Union, and Ukraine. cThe former Yugoslavia includes Yugoslavia, Croatia, Macedonia, Serbia, Slovenia, and Montenegro. (DOC) [file pone.0093174.s002.doc]

Table S2: All-site cancer mortality rate ratios (MRR) and 95% confidence interval (CI) in women by continent, region, and country of birth in Sweden, 1961–2009.

| **Country of birth**** | | | **Cases** | **Person-years** | **MRR* (95%CI)** | **Country of birth** | | | **Cases** | **Person-years** | **MRR* (95%CI)** |
| --- | --- | --- | --- | --- | --- | --- | --- | --- | --- | --- | --- |
|  | | |  |  |  |  | |  |  |  |  |
| **Sweden** | | | 387721 | 189719346 | 1.00 |  | | **Northern Europe** | 17668 | 8305848 | **1.02 (1.01-1.04)** |
| **Outside Sweden** | | | 29537 | 18167077 | 1.00 (0.98-1.01) |  | | Denmark | 2576 | 909070 | **1.24 (1.19-1.29)** |
|  | **Africa** | | 210 | 541656 | **0.85 (0.74-0.98)** |  | | Estonia | 1475 | 365169 | 0.99 (0.94-1.05) |
|  | | **Eastern Africa** | 128 | 344544 | **0.95 (0.79-1.13)** |  | | Finland | 9346 | 5439421 | **0.97 (0.95-0.99)** |
|  | | Eritrea | 12 | 46049 | 0.75 (0.42-1.33) |  | | Iceland | 61 | 57289 | **1.53 (1.19-1.97)** |
|  | | Ethiopia | 50 | 108322 | **1.35 (1.02-1.78)** |  | | Ireland | 8 | 11513 | 0.81 (0.40-1.62) |
|  | | Kenya | 8 | 15602 | 1.25 (0.62-2.51) |  | | Latvia | 269 | 71532 | 0.96 (0.85-1.08) |
|  | | Somalia | 35 | 116772 | 0.77 (0.55-1.08) |  | | Lithuania | 32 | 18964 | 1.10 (0.77-1.55) |
|  | | Tanzania | 5 | 10270 | 1.16 (0.48-2.69) |  | | Norway | 3629 | 1247700 | **1.04 (1.01-1.07)** |
|  | | Uganda | 12 | 26925 | 1.08 (0.61-1.91) |  | | UK | 272 | 185186 | 0.98 (0.87-1.11) |
|  | | **Middle Africa** | 9 | 20642 | 0.83 (0.43-1.60) |  | | **Southern Europe** | 2025 | 1968846 | **0.92 (0.88-0.97)** |
|  | | **North Africa** | 37 | 101619 | **0.56 (0.40-0.78)** |  | | Bosnia | 539 | 417001 | **1.34 (1.20-1.49)** |
|  | | Egypt | 13 | 19969 | 0.60 (0.35-1.04) |  | | Former Yugoslaviac | 1062 | 1089241 | 0.96 (0.90-1.03) |
|  | | Morocco | 16 | 42031 | 0.71 (0.43-1.17) |  | | Greece | 126 | 224367 | **0.54 (0.45-0.64)** |
|  | | Tunisia | 5 | 17638 | 0.56 (0.23-1.36) |  | | Italy | 177 | 108006 | **0.79 (0.68-0.92)** |
|  | | **Southern Africa** | 26 | 18233 | 1.12 (0.76-1.65) |  | | Portugal | 44 | 42909 | 1.00 (0.74-1.35) |
|  | | South Africa | 25 | 16530 | 1.11 (0.75-1.65) |  | | Spain | 74 | 81508 | **0.71 (0.56-0.89)** |
|  | | **Western Africa** | 10 | 56616 | 0.63 (0.34-1.18) |  | | **Western Europe** | 3534 | 1454527 | **0.95 (0.92-0.99)** |
|  | | Gambia | 5 | 19592 | 1.24 (0.51-2.98) |  | | Austria | 372 | 145929 | 0.99 (0.90-1.10) |
|  | **Asia** | | 1349 | 2958265 | **0.78 (0.77-0.82)** |  | | Belgium | 46 | 21238 | 1.24 (0.93-1.66) |
|  | | **Eastern Asia** | 172 | 363606 | 0.90 (0.77-1.05) |  | | France | 120 | 79378 | 0.87 (0.72-1.04) |
|  | | China | 111 | 122652 | 0.94 (0.78-1.14) |  | | Germany | 2809 | 1090658 | **0.95 (0.92-0.99)** |
|  | | Japan | 27 | 39455 | 0.77 (0.52-1.12) |  | | Netherlands | 135 | 74486 | 1.01 (0.85-1.19) |
|  | | Korea_Republic | 29 | 184013 | 1.14 (0.79-1.64) |  | | Switzerland | 50 | 40921 | **0.73 (0.55-0.96)** |
|  | | **South_Central Asia** | 336 | 871335 | **0.66 (0.59-0.74)** |  | **Latin America** | | 444 | 723944 | **0.88 (0.79-0.97)** |
|  | | Afghanistan | 13 | 41753 | 0.69 (0.40-1.20) |  | | **Caribbean** | 10 | 22514 | 0.65 (0.35-1.21) |
|  | | Bangladesh | 12 | 29512 | 1.02 (0.57-1.80) |  | | Cuba | 5 | 10937 | 0.61 (0.25-1.47) |
|  | | India | 50 | 180320 | 0.78 (0.59-1.03) |  | | **Central America** | 38 | 58907 | 1.22 (0.88-1.68) |
|  | | Iran | 230 | 489496 | **0.66 (0.58-0.76)** |  | | El Salvador | 14 | 23947 | 1.05 (0.62-1.78) |
|  | | Pakistan | 12 | 34768 | 0.80 (0.45-1.42) |  | | Mexico | 19 | 14734 | **2.26 (1.44-3.55)** |
|  | | Sri Lanka | 14 | 81884 | 0.65 (0.38-1.10) |  | | **South America** | 396 | 642522 | **0.85 (0.76-0.94)** |
|  | | **South_Eastern Asia** | 175 | 467563 | **0.85 (0.73-0.99)** |  | | Argentina | 43 | 39900 | 0.91 (0.67-1.23) |
|  | | Cambodia | 5 | 4525 | 1.33 (0.55-3.20) |  | | Bolivia | 13 | 28577 | 0.65 (0.37-1.12) |
|  | | Indonesia | 9 | 21809 | 0.77 (0.40-1.49) |  | | Brazil | 33 | 54083 | 1.08 (0.77-1.53) |
|  | | Philippines | 30 | 89603 | 0.81 (0.56-1.16) |  | | Chile | 227 | 334862 | 0.88 (0.77-1.01) |
|  | | Thailand | 66 | 203725 | 1.05 (0.82-1.34) |  | | Colombia | 16 | 80898 | 0.75 (0.46-1.23) |
|  | | Vietnam | 57 | 124875 | 0.82 (0.63-1.07) |  | | Peru | 29 | 47754 | 0.94 (0.65-1.36) |
|  | | **Western Asia** | 666 | 1255759 | **0.77 (0.71-0.84)** |  | | Uruguay | 29 | 33338 | 0.83 (0.57-1.20) |
|  | | Cyprus | 8 | 5985 | 1.46 (0.73-2.93) |  | **North America** | | 895 | 345434 | 0.93 (0.87-1.00) |
|  | | Iraq | 191 | 425887 | 0.90 (0.77-1.05) |  | | Canada | 57 | 36514 | 1.08 (0.83-1.41) |
|  | | Israel | 6 | 16977 | 0.87 (0.39-1.95) |  | | USA | 838 | 308681 | **0.93 (0.87-0.99)** |
|  | | Jordan | 8 | 12124 | 1.45 (0.72-2.90) |  | **Oceania** | | 18 | 31201 | 0.99 (0.62-1.58) |
|  | | Lebanon | 63 | 190449 | 0.79 (0.62-1.02) |  | | **Australia_New** | 18 | 29789 | 1.01 (0.64-1.61) |
|  | |  |  |  |  |  | | **Zealand** |  |  |  |
|  | | Palestinian territories | 18 | 11652 | 0.85 (0.53-1.36) |  | | Australia | 14 | 24211 | 0.95 (0.56-1.60) |
|  | | Syrian Arab Republic | 76 | 153249 | **0.78 (0.62-0.98)** |  | | New Zealand | 5 | 5578 | 1.54 (0.54-3.86) |
|  | | Turkey | 291 | 406654 | **0.75 (0.67-0.85)** |  | |  |  |  |  |
|  | **Europe** | | 26531 | 13516257 | 1.01 (0.99-1.02) |  | |  |  |  |  |
|  | | **Eastern Europe** | 3304 | 1787035 | 1.02 (0.99-1.06) |  | |  |  |  |  |
|  | | Bulgaria | 53 | 43907 | 1.13 (0.86-1.48) |  | |  |  |  |  |
|  | | Former Czechoslovakiaa | 392 | 175319 | 1.04 (0.94-1.15) |  | |  |  |  |  |
|  | | Former Soviet Unionb | 753 | 313095 | 0.99 (0.92-1.06) |  | |  |  |  |  |
|  | | Hungary | 582 | 281001 | 1.03 (0.95-1.11) |  | |  |  |  |  |
|  | | Poland | 1268 | 818422 | 1.04 (0.98-1.10) |  | |  |  |  |  |
|  | | Romania | 256 | 155289 | **1.20 (1.06-1.36)** |  | |  |  |  |  |

*Mortality rate ratios (MRRs) are adjusted for age at follow-up and calendar period at baseline. The reference group is Sweden-born women. MRR values significantly different from 1.0 are highlighted in bold.

**Continents, regions, and countries with at least five cases of cancer mortality.

aThe former Czechoslovakia includes Czechoslovakia, Slovakia, and the Czech Republic.

bThe former Soviet Union includes Belarus, Moldova, Russian Federation, Soviet Union, and Ukraine.

cThe former Yugoslavia includes Yugoslavia, Croatia, Macedonia, Serbia, Slovenia, and Montenegro.
